# Supplementary material
Source: PubMed Central journal article supplement (PMC9556486)
Supplement: ajtr0014-6222-f6.pdf [file ajtr0014-6222-f6.pdf]

# Therapeutic targets for refractory epilepsy

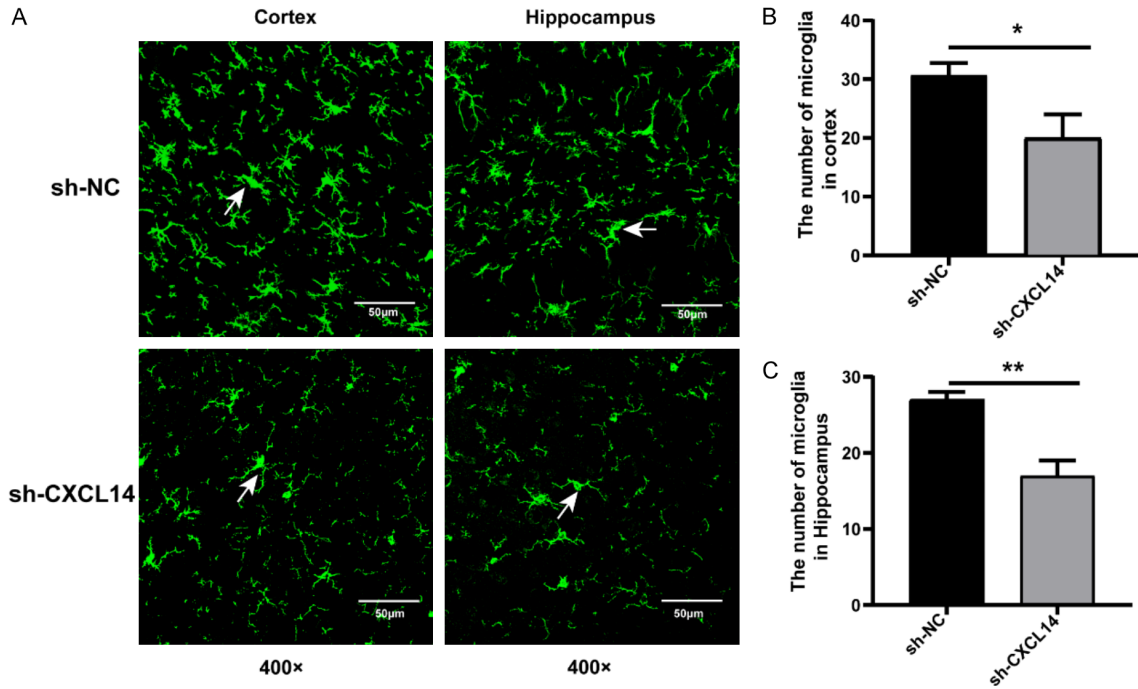

**Figure S1.** CXCL14 attenuates microglial activation 72 hours after seizures. A demonstrates the activation of microglia after 72 hours of seizure on the basis of CXCL14 knockdown. A. Cortical and hippocampal regions with Iba-1 positive cells were observed using fluorescence microscopy (green; AlexaFluor-488 staining). Iba-1 positive cells are indicated by white arrows. Scale bars: 50  $\mu\text{m}$  for 400 $\times$ . B, C. Statistical graphs of the number of microglia in cortex and hippocampus ( $*P<0.05$ ,  $**P<0.01$ , means  $\pm$  standard error of mean (SEM),  $n = 3$  per group).
